# Supplementary material for: One-pot synthesis of uniform carbon-coated MoO2 nanospheres for high-rate reversible lithium storage
Source: Royal Society of Chemistry journal article supplement (doi:10.1039/c0cc01174f), 2010-01-01
Supplement: c0cc01174f.pdf [file c0cc01174f.pdf]

# One-pot synthesis of uniform carbon-coated MoO<sub>2</sub> nanospheres for high-rate reversible lithium storage

Zhiyu Wang,<sup>a,b,c</sup> Jun Song Chen,<sup>a</sup> Ting Zhu,<sup>a</sup> Srinivasan Madhavi,<sup>b,c,\*</sup>  
and Xiong Wen Lou<sup>a,c,\*</sup>

<sup>a</sup>*School of Chemical and Biomedical Engineering, Nanyang Technological University, 70 Nanyang Drive, 637457 (Singapore) E-mail: xwlou@ntu.edu.sg; Tel: +65 63168879*

<sup>b</sup>*School of Materials Science and Engineering, Nanyang Technological University, 50 Nanyang Avenue, 639798 (Singapore) E-mail: madhavi@ntu.edu.sg; Tel: +65 67904606*

<sup>c</sup>*Energy Research Institute @ NTU, Nanyang Technological University, 50 Nanyang Drive, 637553 (Singapore)*

## Experimental

The MoO<sub>2</sub>@C nanospheres were synthesized by hydrothermal reaction of a mixture solution of 10 mL of ammonium heptamolybdate tetrahydrate (AHM) solution (6 mM), 1 mL of ethylene glycol (EG), 10 mL of polyvinylpyrrolidone (PVP) (MW: 58,000) solution (0.1 g mL<sup>-1</sup>) and 10 mL of deionized (DI) water in a 60 mL Teflon-lined autoclave at 180 °C for 60 h. The final black products were collected by 3 centrifuge-disperse-rinse cycles with DI water and ethanol, and dried at 60 °C. The as-synthesized sample was further annealed at 700 °C for 4h in a N<sub>2</sub> flow to obtain the final product of MoO<sub>2</sub>@C nanospheres. The samples were characterized by field-emission scanning electron microscope (FESEM, JEOL, JSM-6700F), transmission electron microscope

(TEM, JEOL, JEM-2100F), X-ray diffraction (XRD, Bruker, D8-Advance X-ray Diffractometer, Cu Ka), nitrogen adsorption/desorption (Quantachrome Instruments, Autosorb AS-6B), thermogravimetric analysis (TGA, Shimadzu, DRG-60).

The galvanostatic charging/discharging tests were conducted on a Neware battery tester with lithium foil as the counter and reference electrodes and 1.0 M LiPF<sub>6</sub> in mixed ethylene carbonate and diethyl carbonate (EC:DEC, 1:1 by weight) as the electrolyte. A cut-off voltage window of 0.1 – 3.0 V is used. The working electrode is composed of MoO<sub>2</sub>@C nanospheres, carbon black (super-P-Li) and polyvinylidene difluoride (PVDF) in a weight ratio of 8:1:1. The mass of active materials is around 1-2 mg, depending on the thickness of film formed on Cu current collector. Cyclic voltammetry (CV) study was conducted using an electrochemical workstation (CHI 660C) between 0.1 – 3.0 V at a scan rate of 0.05 mV s<sup>-1</sup>.

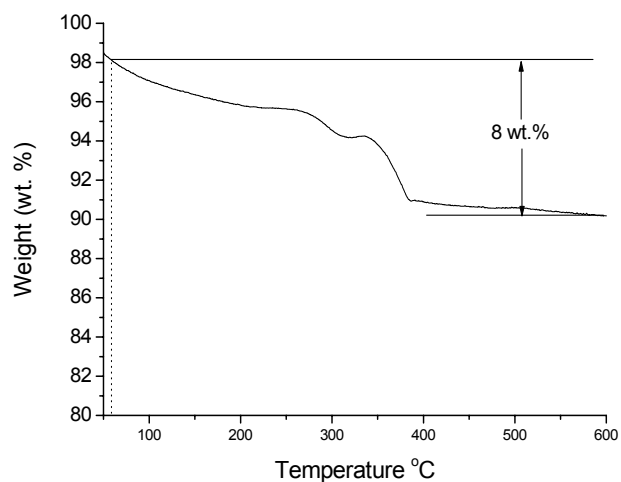

Figure S1. TGA curve of the as-prepared MoO<sub>2</sub> sample in a N<sub>2</sub> flow with a heating rate of 10 °C min<sup>-1</sup>.

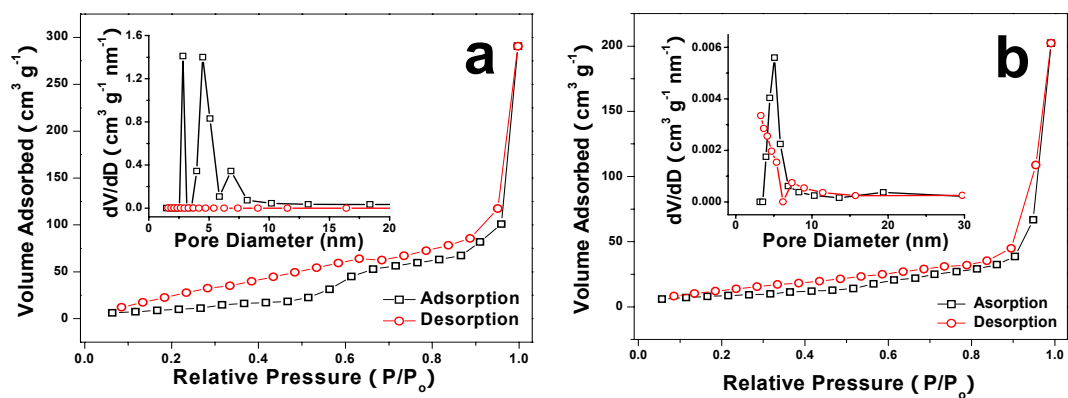

Figure S2. N<sub>2</sub> adsorption/desorption isotherms of the MoO<sub>2</sub>@C nanospheres before (a) and after (b) thermal annealing at 700 °C in N<sub>2</sub>. The corresponding pore size distribution is shown as the inset.

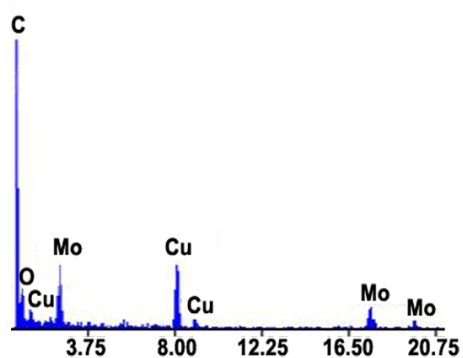

Figure S3. EDX spectrum of the  $\text{MoO}_2@C$  nanospheres. The Cu signal is from the Cu grid.

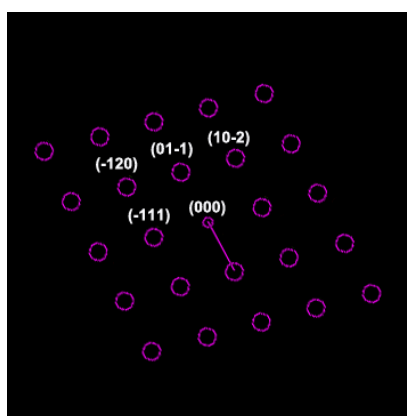

Figure S4. Simulated electron diffraction pattern of a  $\text{MoO}_2$  single crystal along the  $\langle 211 \rangle$  zone axis.

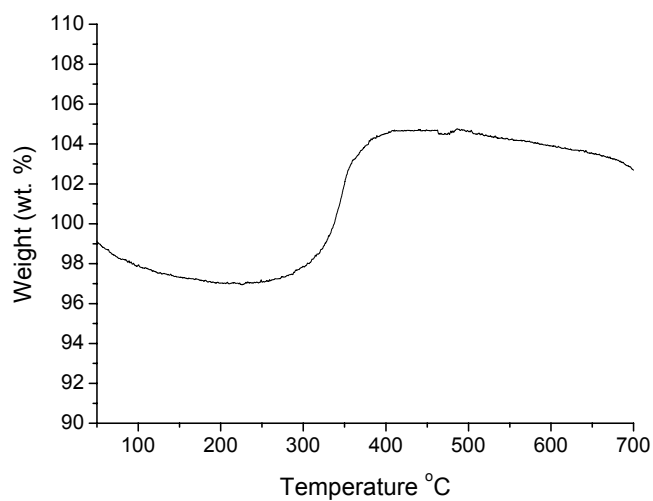

Figure S5. TGA curve of the  $\text{MoO}_2@\text{C}$  nanospheres in air with a heating rate of  $10\text{ }^\circ\text{C min}^{-1}$ . The weight loss before  $300\text{ }^\circ\text{C}$  is due to combustion of the carbon content. The weight gain from  $300\text{ }^\circ\text{C}$  to  $400\text{ }^\circ\text{C}$  is due to the oxidation of  $\text{MoO}_2$  to  $\text{MoO}_3$ . The slight weight loss after  $400\text{ }^\circ\text{C}$  might be attributed to the sublimation of  $\text{MoO}_3$ . The weight fraction of carbon in the initial sample can be easily estimated to be about 6% by assuming that the sample is pure  $\text{MoO}_3$  at  $400\text{ }^\circ\text{C}$ .

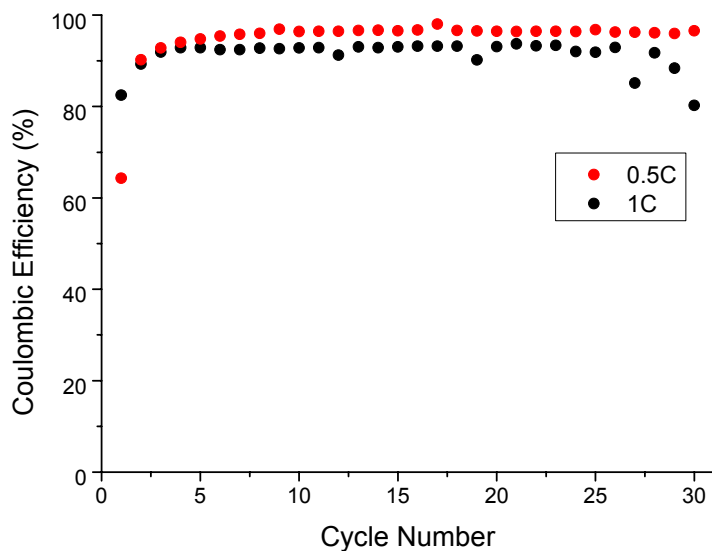

Figure S6. Coulombic efficiency profile of  $\text{MoO}_2@\text{C}$  spheres at 0.5C and 1C rate.

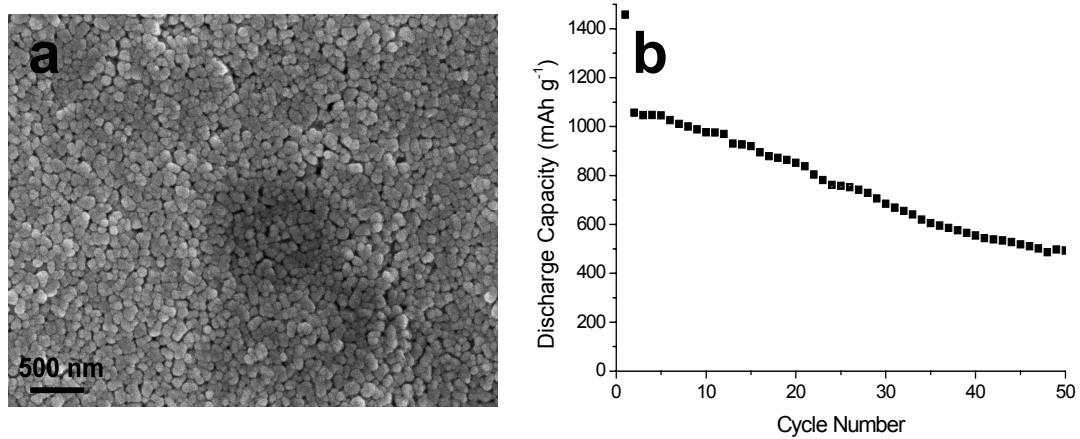

Figure S7. (a) FESEM image and (b) cycling performance of the MoO<sub>3</sub> nanospheres obtained by calcining the MoO<sub>2</sub>@C nanospheres in air at 400 °C for 3 h.
